# Supplementary material for: Electrospray Ionization Efficiency Is Dependent on Different Molecular Descriptors with Respect to Solvent pH and Instrumental Configuration
Source: PubMed Central journal article supplement (PMC5132301; doi:10.1371/journal.pone.0167502), 2016-12-01

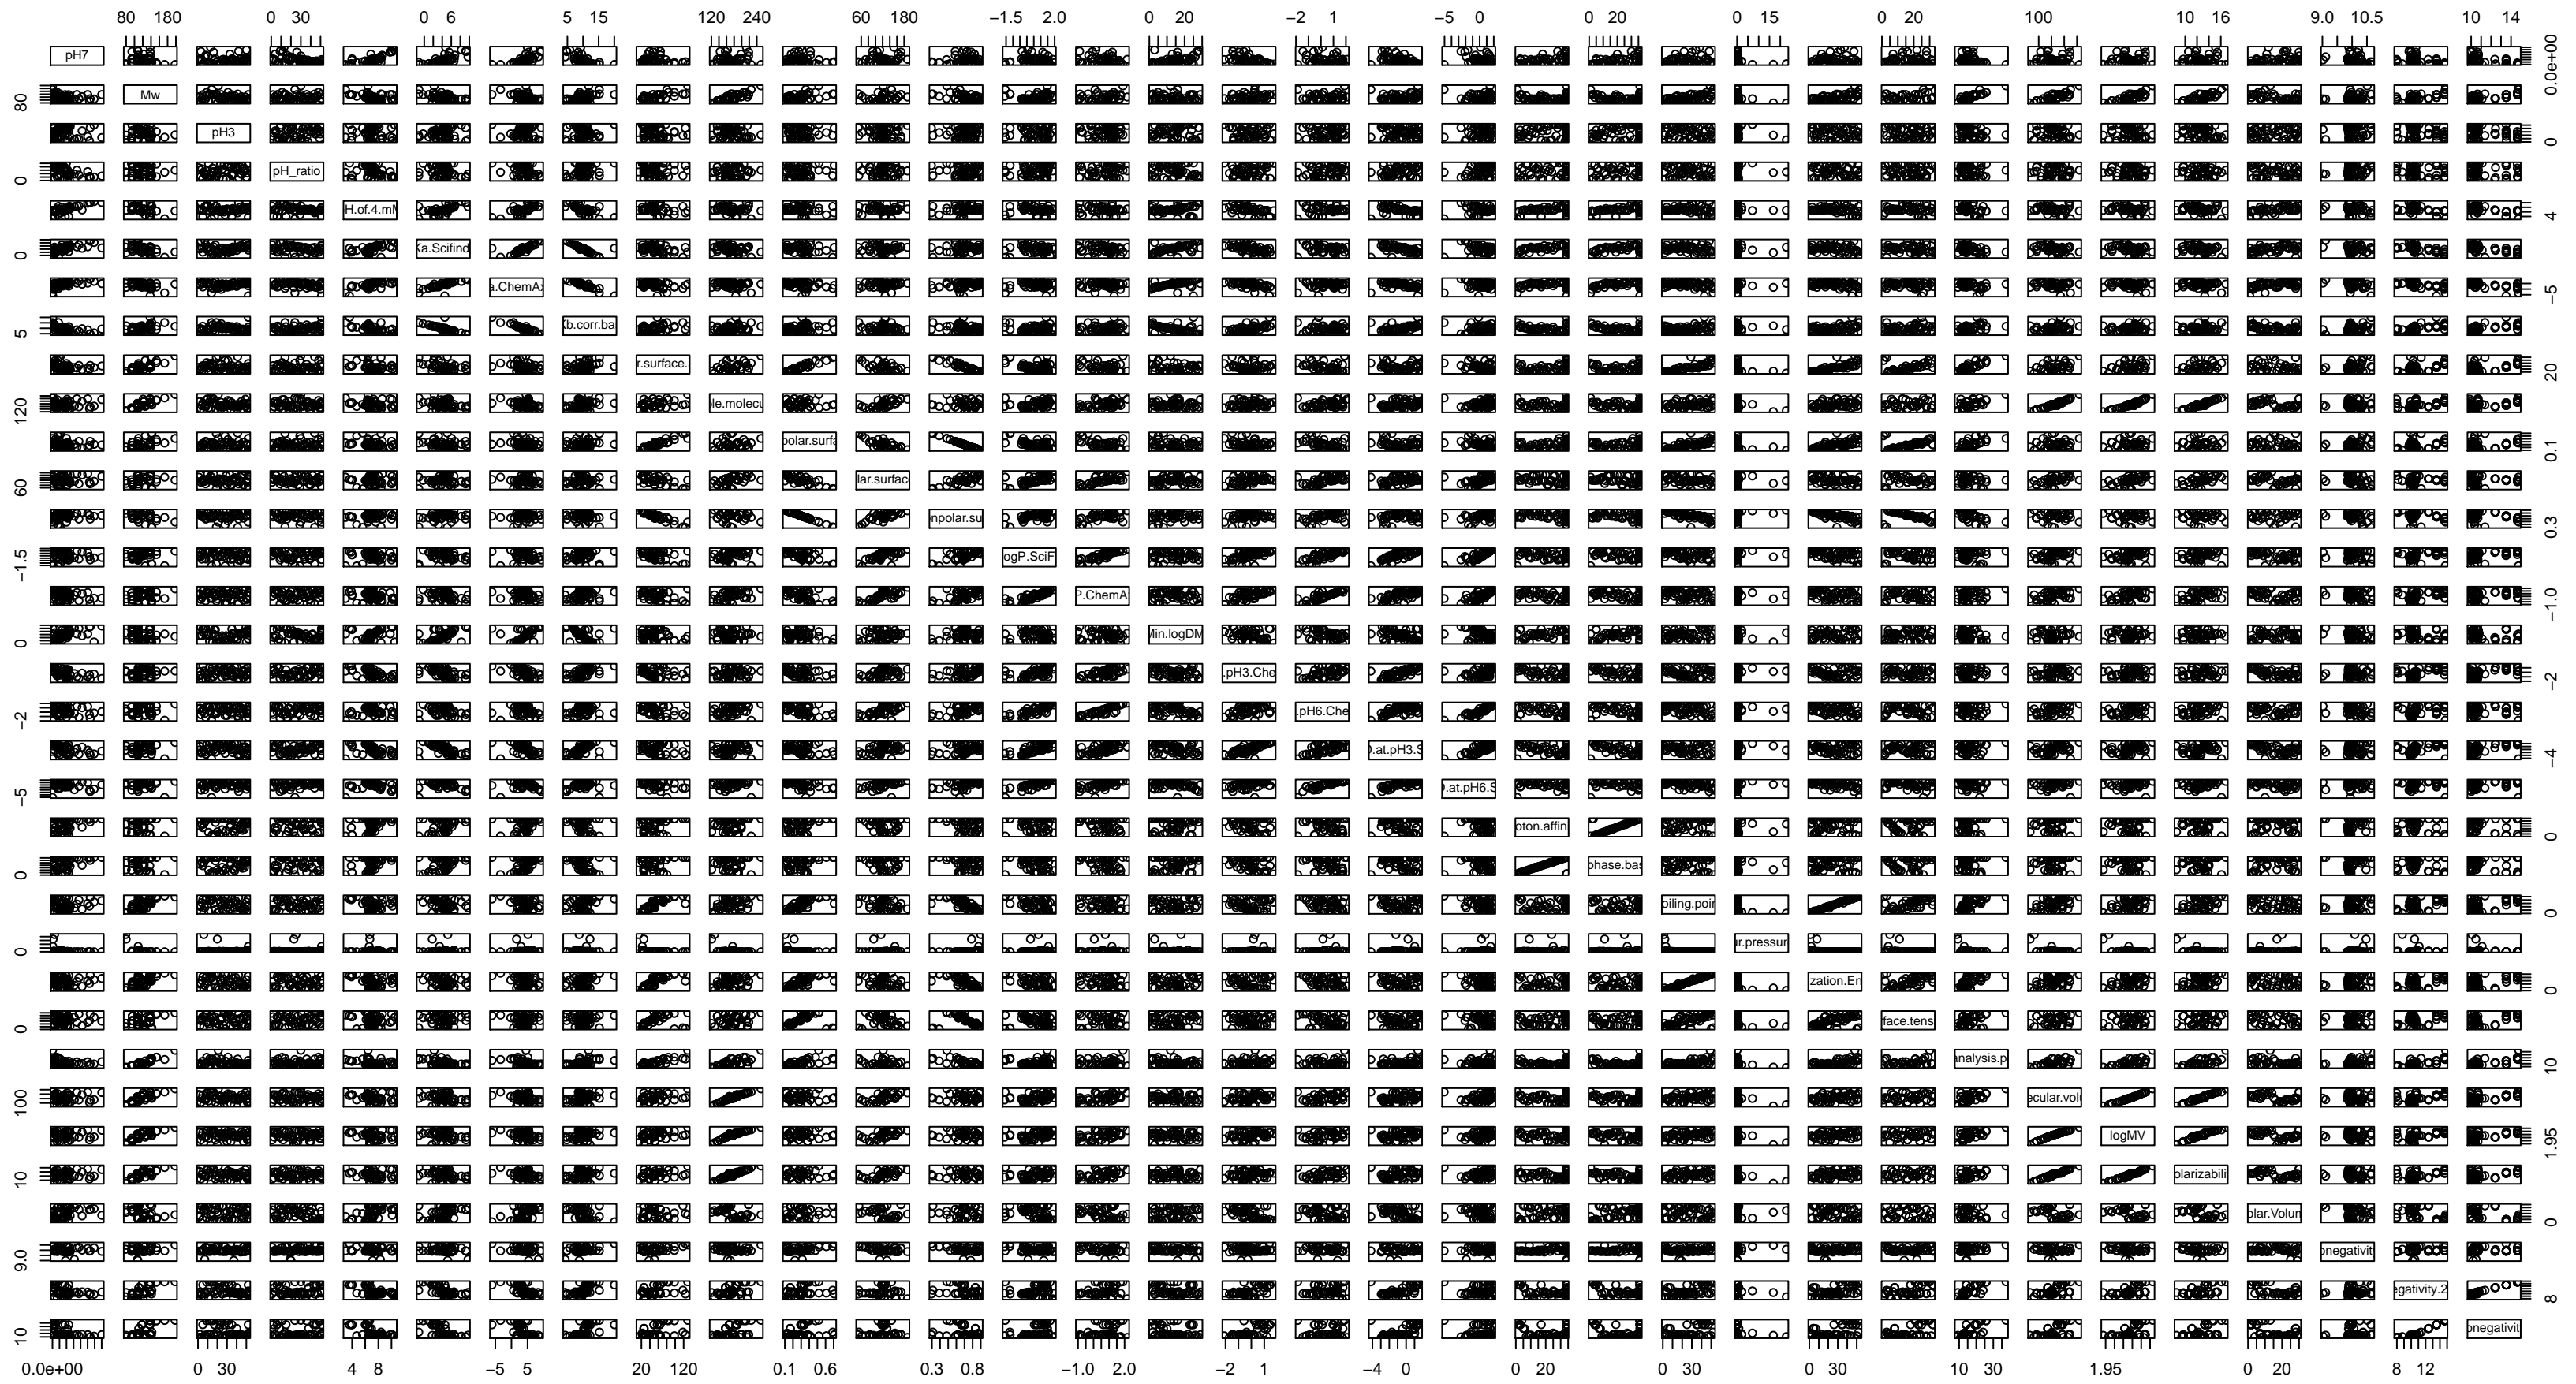

Supplement: pone.0167502.s004.pdf [file pone.0167502.s004.pdf]
